# Supplementary material for: Uncovering hydrogen anion triggered thermal runaway mechanism of a high-energy LiNi0.5Co0.2Mn0.3O2/graphite pouch cell
Source: Research Square preprint supplement (doi:10.21203/rs.3.rs-132558/v1), 2021-01-08
Supplement: Supplementary file 1 [file bbfc2ea730a22c342c6bae1d.docx]

**Supporting Information**

**Uncovering hydrogen anion triggered thermal runaway mechanism of a high-energy LiNi0.5Co0.2Mn0.3O2/graphite pouch cell**

**Uncovering hydrogen anion triggered thermal runaway mechanism of a high-energy LiNi0.5Co0.2Mn0.3O2/graphite pouch cell**

Lang Huang1,4, Gaojie Xu1,2,4, Xiaofan Du1, Jiedong Li1,Bin Xie1,Di Lu1, Haisheng Liu1, Min Zhao1, Pengxian Han1, Shanmu Dong1, Guanglei Cui1,5,*, Liquan Chen2,3

1Qingdao Industrial Energy Storage Research Institute, Qingdao Institute of Bioenergy and Bioprocess Technology, Chinese Academy of Sciences, No. 189 Songling Road, Qingdao 266101, China.

2Center of Materials Science and Optoelectronics Engineering, University of Chinese Academy of Sciences, No. 19A Yuquan Road, Beijing 100049, China.

3Key Laboratory for Renewable Energy, Beijing Key Laboratory for New Energy Materials and Devices, Beijing National Laboratory for Condensed Matter Physics, Institute of Physics, Chinese Academy of Sciences, Beijing 100190, China

4These authors contribute equally to this work

5 Lead contact

*Correspondence: cuigl@qibebt.ac.cn


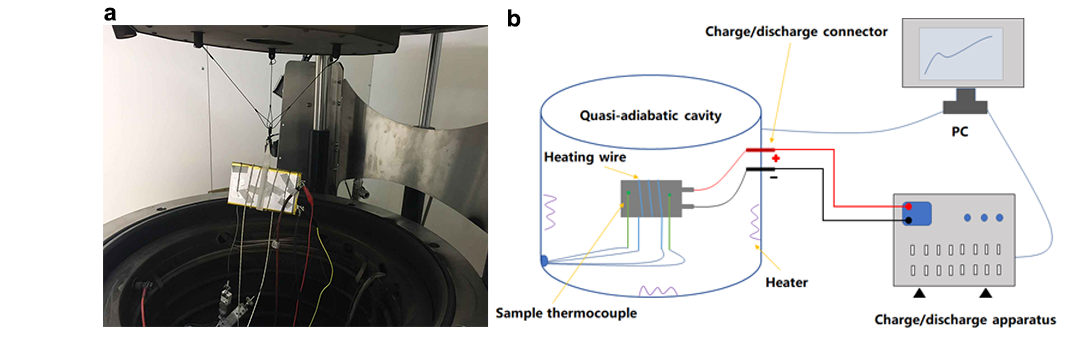


**Figure S1** (a) The photographs of ARC (BTC500, HEL) for total heat determination. (b) Schematic illustration of the working principle.


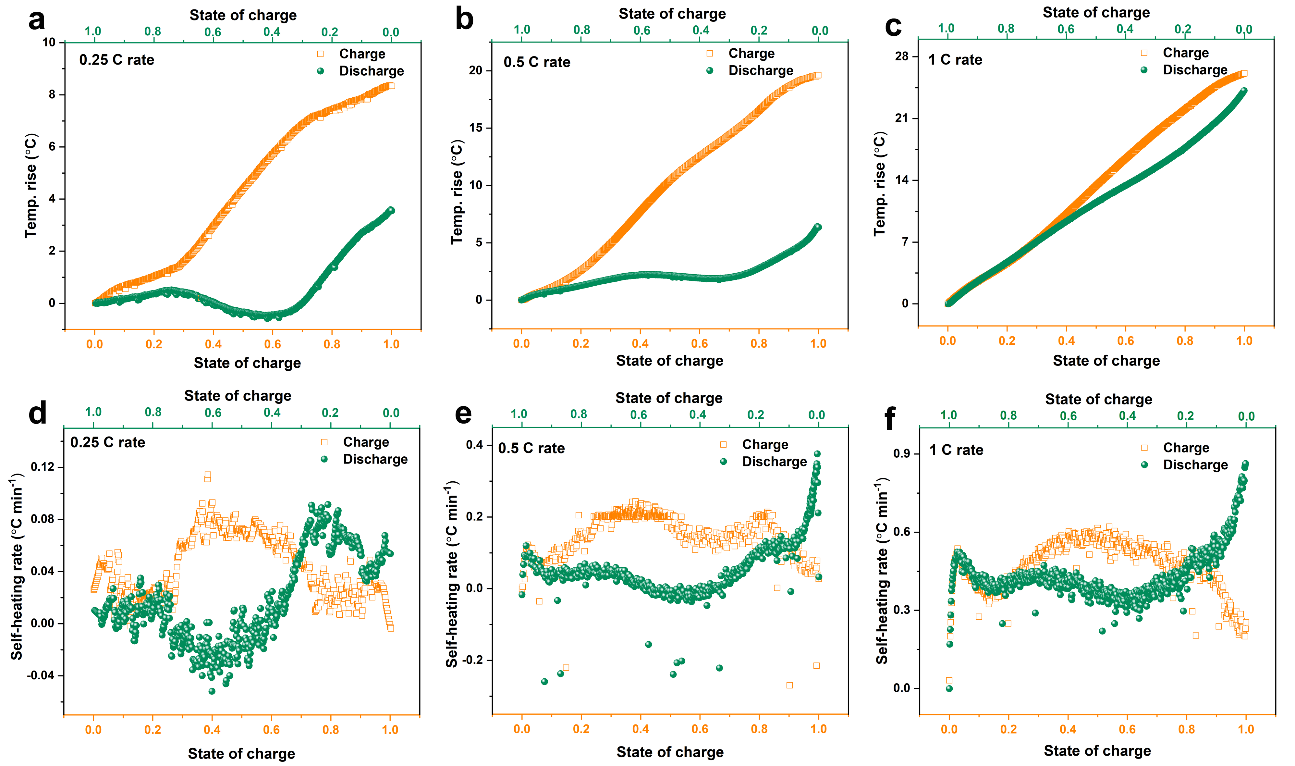


**Figure S2** (a-c) The temperature rise and (d-f) self-heating rate when charging and discharging 5 Ah NCM523/G pouch cell at varied current rates under the adiabatic mode of ARC equipment.

When adjusting the cycling C-rate to 0.25 C and 1 C, the temperature increase is 3.5℃ and 24.1℃ for discharge, and 8.3℃and 26.1℃ for charge **(Figure S2).**


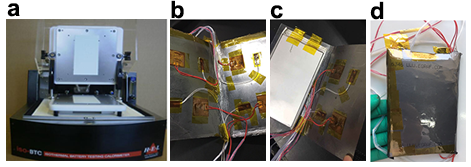


**Figure S3.** (a) The photographs of isoBTC (HEL). (b-d) Photographs showing the set-up of pouch cell for isothermal testing.


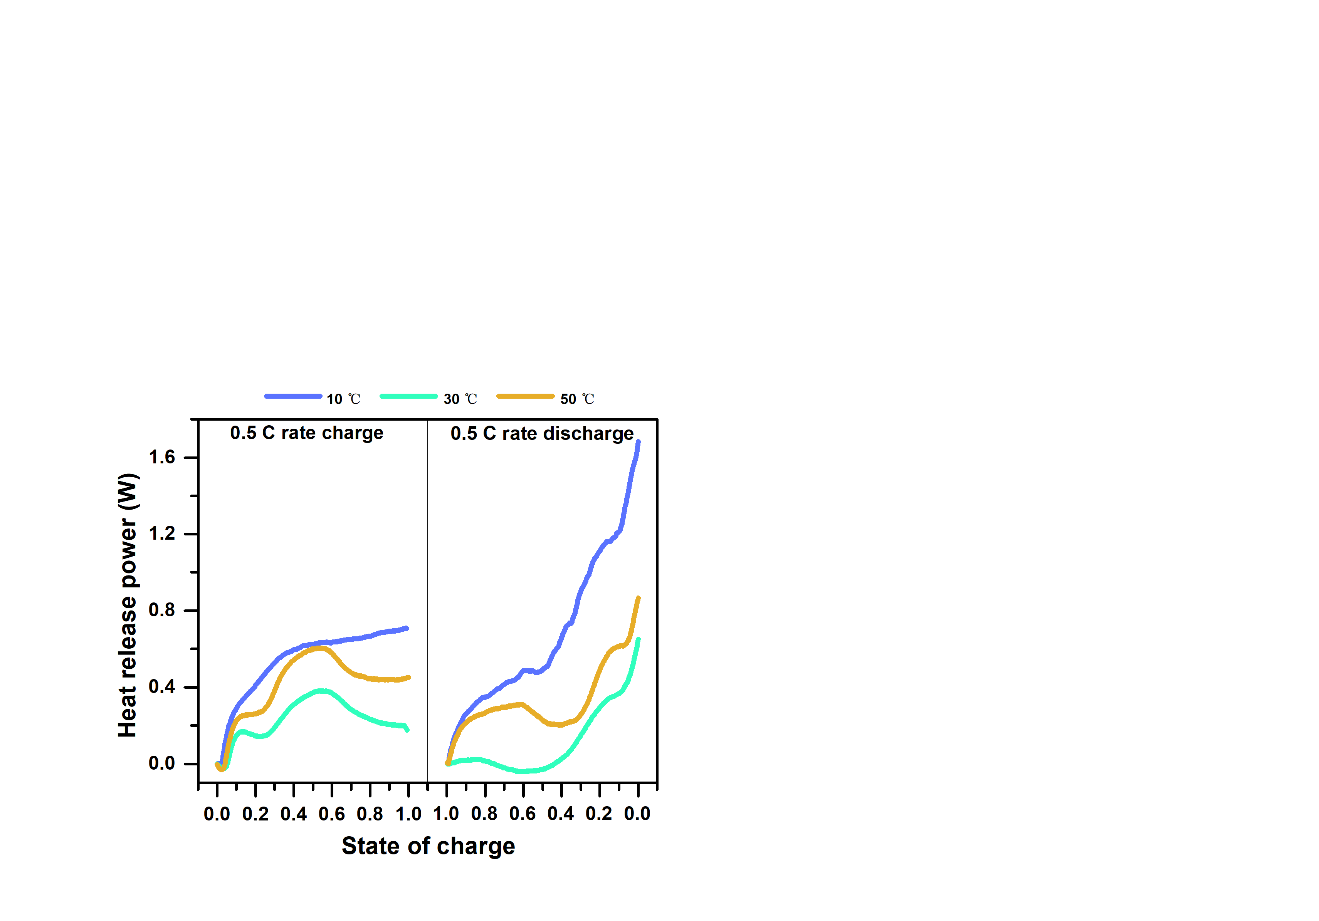


**Figure S4.** The heat release power when charging and discharging 5 Ah NCM523/G pouch cell at 0.5 C rate at varied temperature of 10℃, 30℃, and 50℃, under isothermal condition of IMC equipment.





**Figure S5.** The internal ohmic resistance of 5 Ah NCM523/G pouch cell (fresh cell and cycled cell for 400 cycles) at 0.5 C rate


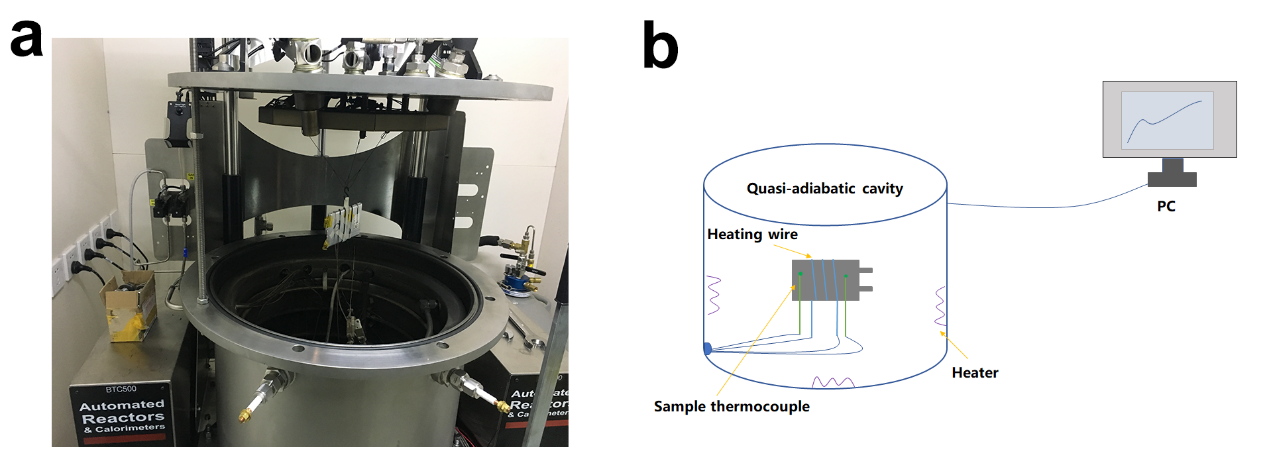


**Figure S6** (a) The photographs of ARC (BTC500, HEL) for thermal runaway study. (b) Schematic illustration of the working principle.





**Figure S7** The self-heating rate curves when 5 Ah NCM523/G pouch cells (at 0% SOC and at 100% SOC, after formation process) are tested by the heat-wait-search (HWS) mode of ARC.


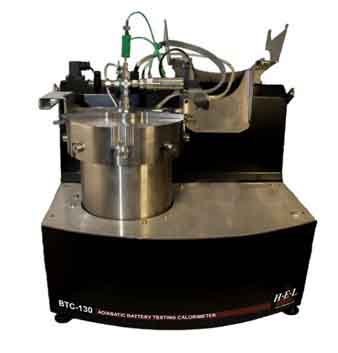


**Figure S8** The photographs of ARC (BTC130, HEL) for thermal runaway study of battery materials.





**Figure S9** XRD patterns of powders collected after thermal runaway of NCM523/G pouch cell ( 0 and 100% SOC).





**Figure S10** Heat flow of pristine electrolyte, pristine anode/electrolyte, and cycled anode (0% SOC) /electrolyte when tested in a STA system.


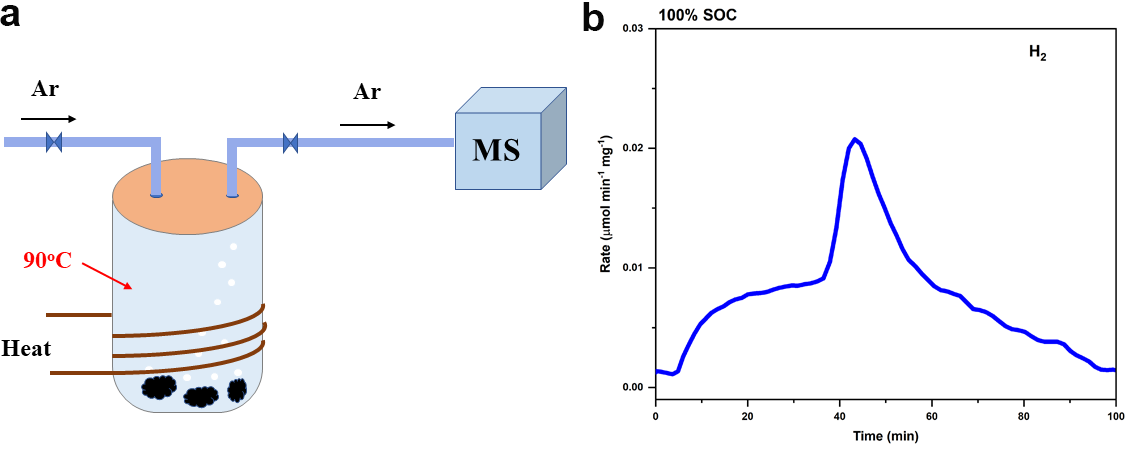


**Figure S11** (a)Schematic illustration of delicately-designed *on-line* gas analysis MS system for heating fully-lithiated graphite (100% SOC). (b) The H2 evolution rate curve after heating fully-lithiated graphite (100% SOC). (mg-1, divided by the sample mass for titration). The graphite anodes are carefully and separately dissembled from fully charged (100% SOC) 5 Ah NCM523/G pouch cells.

**Figure S12** The HD evolution rate curve after D2O titration on samples of (a) fully-lithiated graphite dissembled from fully charged (100% SOC) NCM523/G pouch cell using commercial LiPF6 carbonate electrolyte, (b) fully-delithiated graphite from fully discharged (0% SOC) NCM811/G pouch cell using commercial LiPF6 carbonate electrolyte, and (c) fully-lithiated graphite dissembled from fully charged (100% SOC) NCM811/G pouch cell using commercial LiPF6 carbonate electrolyte.


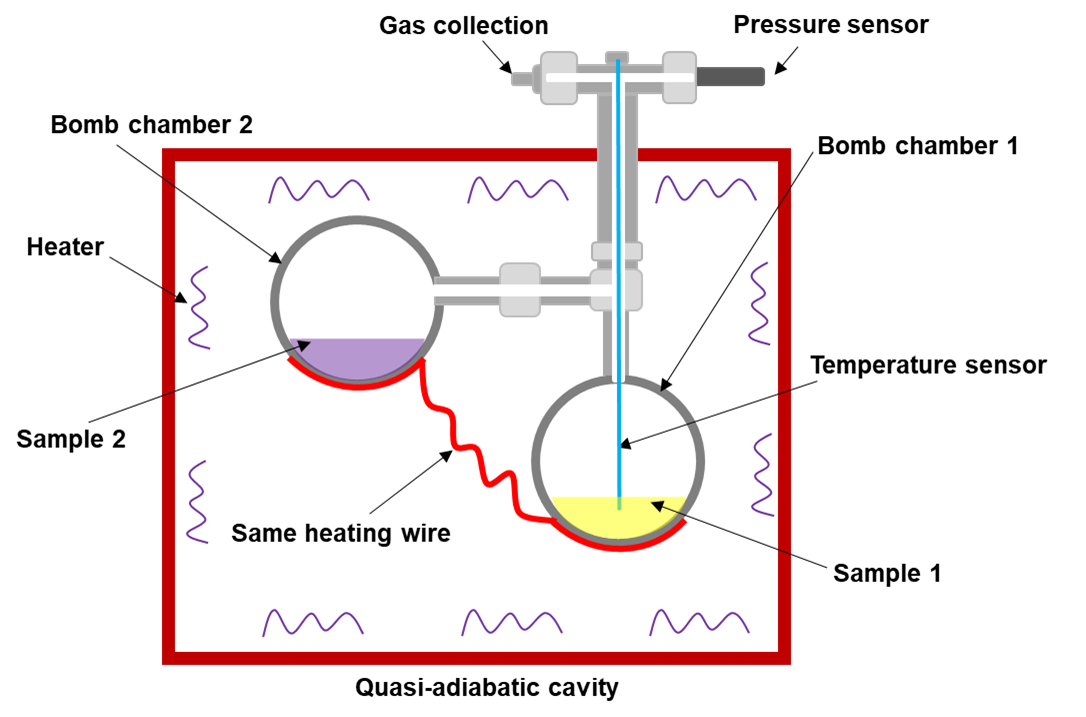


**Figure S13** Schematic illustration of a self-made system containing two bomb chambers, for crosstalk effect study in ARC (BTC130, HEL).





**Figure S14** The determined components percentage in collected gas after ARC testing, in a self-made two bomb chamber system containing cathode/electrolyte and anode/electrolyte separately (as illustrated in Figure S12)


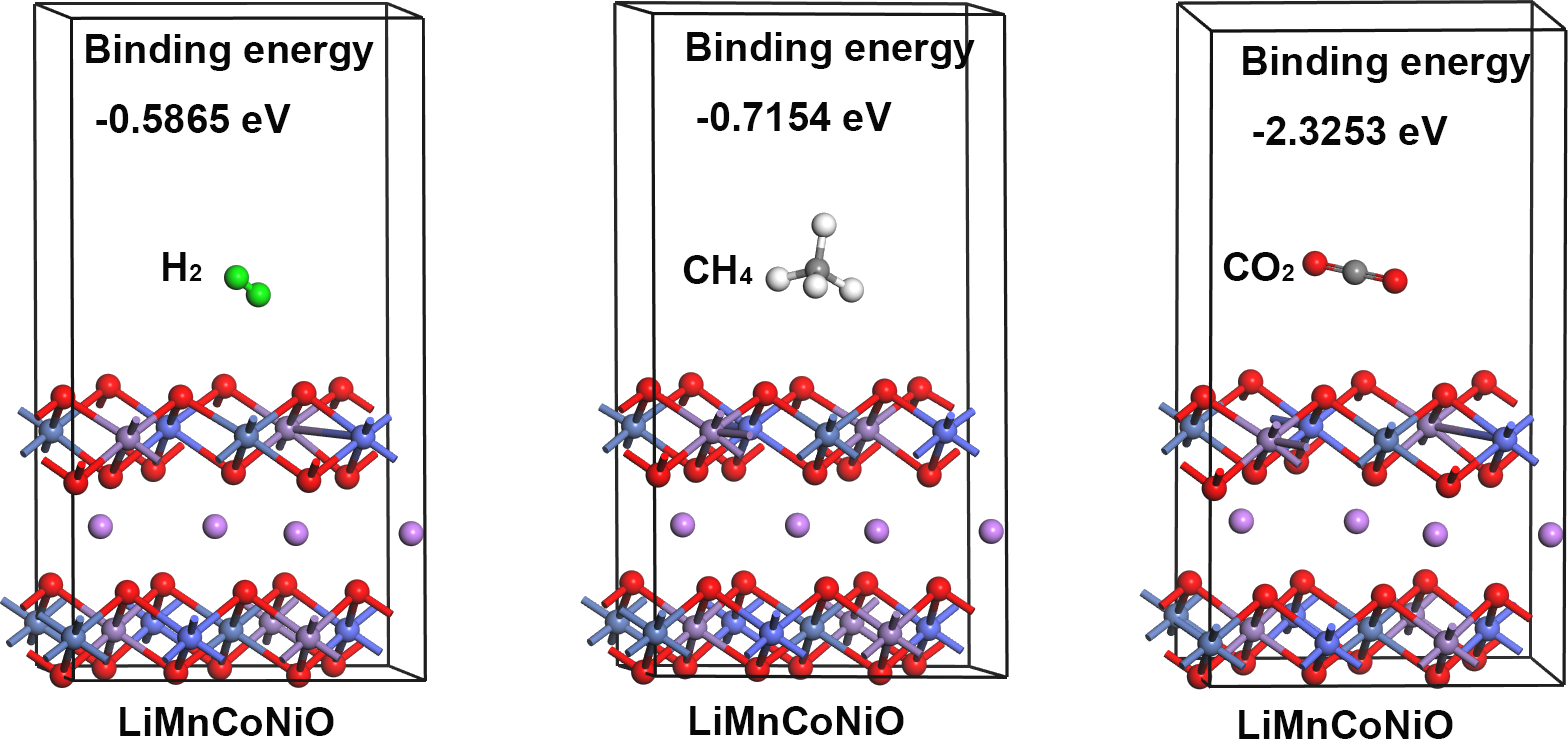


**Figure S15** The calculated binding energy of H2, CH4, and CO2 with NCM cathode

**Computational methods**

Periodic planewave DFT+U calculations for the cathode interface systems were performed using the Vienna ab initio Simulation (VASP) [1-3] within MedeA® computational environment [4] with the spin-polarized Perdew-Burke-Ernzerhof (PBE) exchange-correlation functional and the projector- augmented wave (PAW) scheme to treat core electrons [5-7]. VASP standard pseudopotentials (PP) were used for carbon, oxygen, and hydrogen atoms. PAW PPs employed for the transition metal atoms Co, Ni and Mn (denoted as Co_pv, Ni_pv and Mn_pv, respectively) treat p semi-core states as valence states. The Li_sv PP used for Li treats the 1s shell as valence states. For the +U augmented treatment of Co, Ni and Mn 3d orbitals, we chose a Ueff value of 4.91eV for Co, 5.96 eV for Ni and 5.0 eV for Mn [8, 9]. To describe the weak van der Waals’force (VDW), the DFT-D3-BJ-damping correction was adopted for geometric optimization [10]. We adopted the NCM disordered configuration (Monoclinic phase) with distributed Co, Ni and Mn ions. The lattice parameters, cell volumes and the atomic positions are fully optimized and relaxed until the energy is less than 1 × 10−5 eV per unit cell and the force on each atom is less than 0.02 eV Å−1. We used the conjugate gradient minimization method for geometry optimization. For our simulated structures, the kinetic energy cutoffs were set at 500 eV for the plane wave basis set and the calculation were spin-polarized. A Monkhorst-Pack grid with 2×2×2 meshes was employed in the irreducible Brillouin zone [11]. The (001) surface for the fully delithiated NCM structure was generated by removing the two Li atoms from the corresponding fully lithiated slab structure and re-optimizing. The NCM(001) slab consists of 7 layers and an xy-plane of dimensions 5.0 Å x 8.6 Å with 15 Å of vacuum in the z-direction. In order to calculate the adsorption energies of gas molecules on NCM(001) slab, we use the following formula:

Eads = Etot − Esheet − Egas molecules

where Etot, Esheet and Egas molecules represents the total energy of the system, energy of NCM(001) slab and energy of gas molecules.

References:

[1] G. Kresse, J. Hafner. Phys. Rev. B 1993, 47, 558

[2] G. Kresse, J. Furthmüller. Phys. Rev. B 1996, 54, 11169

[3] G. Kresse, J. Joubert. Phys. Rev. B 1999, 59, 1758

[4] MedeA® version 3.02, 2020, Materials Design, Inc., Santa Fe, NM 87501

[5] J.P. Perdew, K. Burke, M. Ernzerhof, Phys. Rev. Lett., 77 (1996) 3865-3868.

[6] J.P. Perdew, K. Burke, M. Ernzerhof, Phys. Rev. Lett., 1997, 78: 1396-1396.

[7] G. Kresse, D. Joubert, Phys. Rev. B, 59 (1999) 1758-1775.

[8] F. Zhou, M. Cococcioni, C.A. Marianetti, D. Morgan, G. Ceder, Physical Review B, 70 (2004).

[9] G. Zhong, Y. Li, P. Yan, et al. J.Phys. Chem. C, 2010, 114(8), 3693–3700.

[10] J.Klimeš, D. R. Bowler, A. Michaelides, Phys. Rev. B: Condens. Matter Mater. Phys. 2011, 83, 195131.

[11] F. Du, X. Ren, J. Yang, J. Liu and W. Zhang, J. Phys. Chem. C, 2014, 118, 10590–10595
